# Supplementary material for: Contaminant DNA in bacterial sequencing experiments is a major source of false genetic variability
Source: PubMed Central journal article supplement (PMC7053099; doi:10.1186/s12915-020-0748-z), 2020-03-02
Supplement: 12915_2020_748_MOESM8_ESM.pdf [file 12915_2020_748_MOESM8_ESM.pdf]

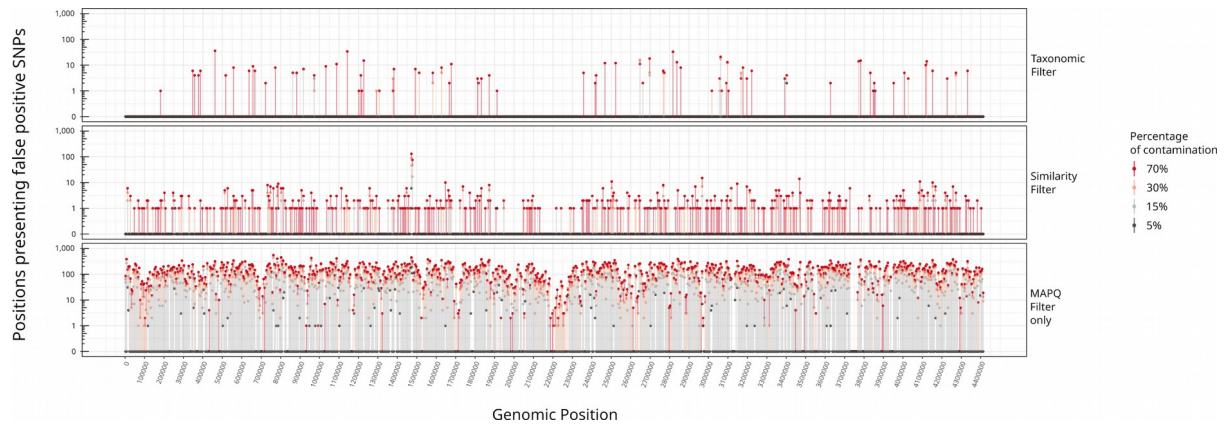

**Figure S2. Contaminations can lead to incorrect calls across the *M. tuberculosis* genome.** Number of positions (in 1,000 bp windows) with false positive SNPs arising from 5%, 15%, 30% and 70% contaminations with different organisms in mock contaminated MTB WGS samples.
